# Supplementary material
Source: publisher site journal article supplement (https://static.cambridge.org/content/id/urn:cambridge.org:id:article:S0008347X18000640/resource/name/S0008347X18000640supp002.pdf)
Supplement: Supplementary file 1 [file S0008347X18000640supp002.pdf]

**Supplementary Table 1. Numbers of female and male *T. klimeschi* caught in each funnel traps baited. “1–12” Represents 12 iterations. ♀: Female; ♂: Male; S: Sum**

|                           | 1  |    |     | 2  |    |    | 3  |    |    | 4  |    |     | 5  |    |    | 6  |    |     | 7  |    |    | 8  |    |    | 9  |    |    | 10 |    |    | 11 |    |     | 12 |    |    |
|---------------------------|----|----|-----|----|----|----|----|----|----|----|----|-----|----|----|----|----|----|-----|----|----|----|----|----|----|----|----|----|----|----|----|----|----|-----|----|----|----|
|                           | ♀  | ♂  | S   | ♀  | ♂  | S  | ♀  | ♂  | S  | ♀  | ♂  | S   | ♀  | ♂  | S  | ♀  | ♂  | S   | ♀  | ♂  | S  | ♀  | ♂  | S  | ♀  | ♂  | S  | ♀  | ♂  | S  | ♀  | ♂  | S   | ♀  | ♂  | S  |
| Nonanal                   | 26 | 35 | 61  | 29 | 28 | 57 | 19 | 28 | 47 | 30 | 12 | 42  | 26 | 27 | 53 | 20 | 27 | 47  | 6  | 12 | 18 | 47 | 20 | 67 | 19 | 19 | 38 | 13 | 11 | 24 | 34 | 26 | 60  | 16 | 22 | 38 |
| 2-methyl-butanal          | 4  | 7  | 11  | 49 | 47 | 96 | 11 | 12 | 23 | 33 | 35 | 68  | 20 | 26 | 46 | 30 | 41 | 51  | 4  | 6  | 10 | 19 | 13 | 32 | 15 | 15 | 30 | 26 | 30 | 56 | 5  | 4  | 9   | 29 | 22 | 51 |
| Decanal                   | 16 | 15 | 31  | 26 | 29 | 55 | 22 | 21 | 43 | 36 | 20 | 56  | 38 | 39 | 77 | 19 | 21 | 40  | 5  | 4  | 9  | 24 | 24 | 48 | 19 | 22 | 41 | 36 | 35 | 71 | 17 | 12 | 28  | 22 | 12 | 34 |
| 2-hydroxy-benzaldehyde    | 23 | 28 | 51  | 37 | 38 | 75 | 24 | 22 | 46 | 24 | 21 | 45  | 24 | 34 | 58 | 25 | 26 | 51  | 12 | 7  | 17 | 13 | 15 | 38 | 15 | 15 | 30 | 26 | 41 | 67 | 47 | 53 | 100 | 26 | 27 | 53 |
| (Z)-3-hexen-1-ol benzoate | 14 | 14 | 28  | 29 | 40 | 69 | 17 | 8  | 25 | 23 | 22 | 45  | 25 | 22 | 47 | 15 | 20 | 35  | 12 | 12 | 24 | 17 | 14 | 31 | 8  | 6  | 14 | 21 | 20 | 41 | 12 | 18 | 30  | 17 | 10 | 36 |
| Methyl benzoate           | 62 | 70 | 132 | 25 | 22 | 47 | 36 | 34 | 70 | 50 | 57 | 107 | 21 | 22 | 43 | 51 | 54 | 105 | 36 | 36 | 72 | 26 | 28 | 54 | 17 | 19 | 36 | 36 | 38 | 74 | 25 | 22 | 47  | 20 | 24 | 44 |
| Methyl salicylate         | 22 | 23 | 45  | 28 | 21 | 49 | 30 | 26 | 56 | 29 | 30 | 59  | 19 | 17 | 36 | 30 | 35 | 65  | 8  | 8  | 16 | 30 | 26 | 56 | 16 | 13 | 29 | 12 | 15 | 27 | 21 | 26 | 47  | 11 | 11 | 22 |
| Geraniol                  | 14 | 16 | 30  | 50 | 42 | 92 | 23 | 25 | 48 | 38 | 37 | 75  | 30 | 31 | 61 | 39 | 41 | 80  | 4  | 1  | 5  | 9  | 11 | 20 | 21 | 22 | 43 | 20 | 30 | 50 | 2  | 4  | 6   | 26 | 20 | 46 |
| Blank control             | 3  | 3  | 6   | 3  | 1  | 4  | 2  | 3  | 5  | 2  | 4  | 6   | 2  | 0  | 2  | 0  | 0  | 0   | 3  | 4  | 7  | 1  | 2  | 3  | 0  | 1  | 1  | 2  | 3  | 5  | 1  | 0  | 1   | 1  | 1  | 2  |
| Solvent control           | 9  | 8  | 17  | 5  | 7  | 12 | 6  | 7  | 13 | 6  | 3  | 9   | 1  | 2  | 3  | 6  | 5  | 11  | 4  | 3  | 7  | 9  | 7  | 16 | 14 | 8  | 22 | 0  | 2  | 2  | 0  | 2  | 2   | 2  | 2  | 4  |
